# Supplementary material for: Unveiling mechanisms and onset threshold of humping in high-speed laser welding
Source: PubMed Central journal article supplement — Nat Commun. 2024 Nov 5;15:9546. doi: 10.1038/s41467-024-53888-w (PMC11538395; doi:10.1038/s41467-024-53888-w), 2024-11-05
Supplement: 41467_2024_53888_MOESM1_ESM.pdf [file 41467_2024_53888_MOESM1_ESM.pdf]

## Supplementary Information

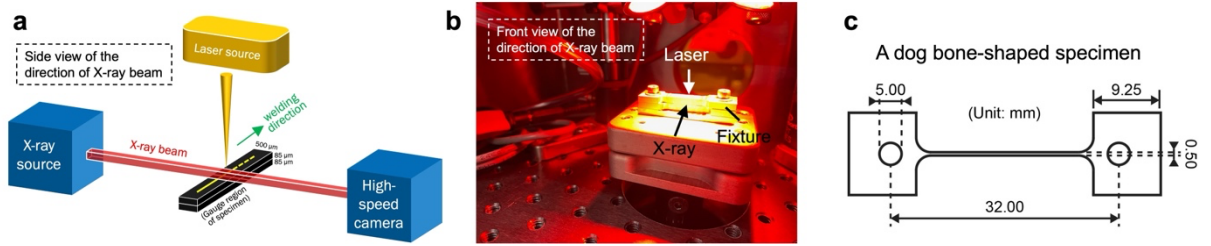

**Supplementary Fig. 1: Experimental setup of in situ high-speed synchrotron X-ray imaging at ANL**

**a** The side and **b** the front views of the direction of X-ray beam. The laser welding configuration was an overlapped weld. **c** Geometry of the dog bone-shaped specimen. Narrow width (500  $\mu\text{m}$ ) in the gauge region is required due to the strong attenuation of X-ray on stainless steel.

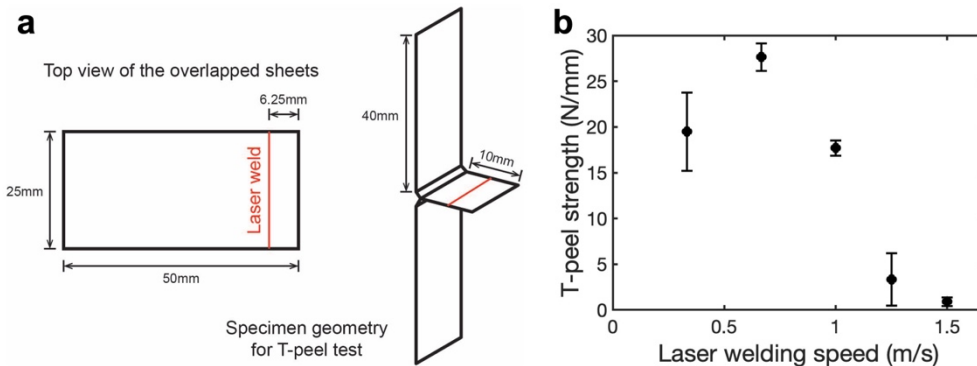

**Supplementary Fig. 2: T-peel strengths of laser welds**

**a** The configuration of laser welds made in EWI and the specimen geometry for T-peel test, which followed refs. <sup>1,2</sup>. **b** T-peel strengths of laser welds (defined as the load per unit length of weld). The error bars represent the standard deviation calculated from 3 measurements for each condition.

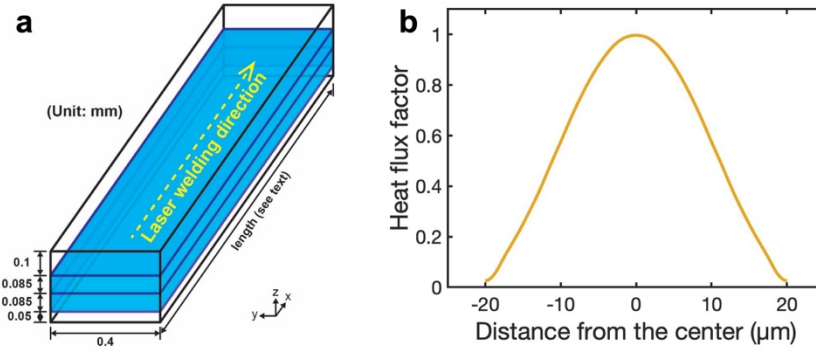

**Supplementary Fig. 3 CFD simulation setup**

**a** Dimensions of the CFD simulation domain. **b** Heat flux factor which describes the laser profile with a Gaussian distribution.

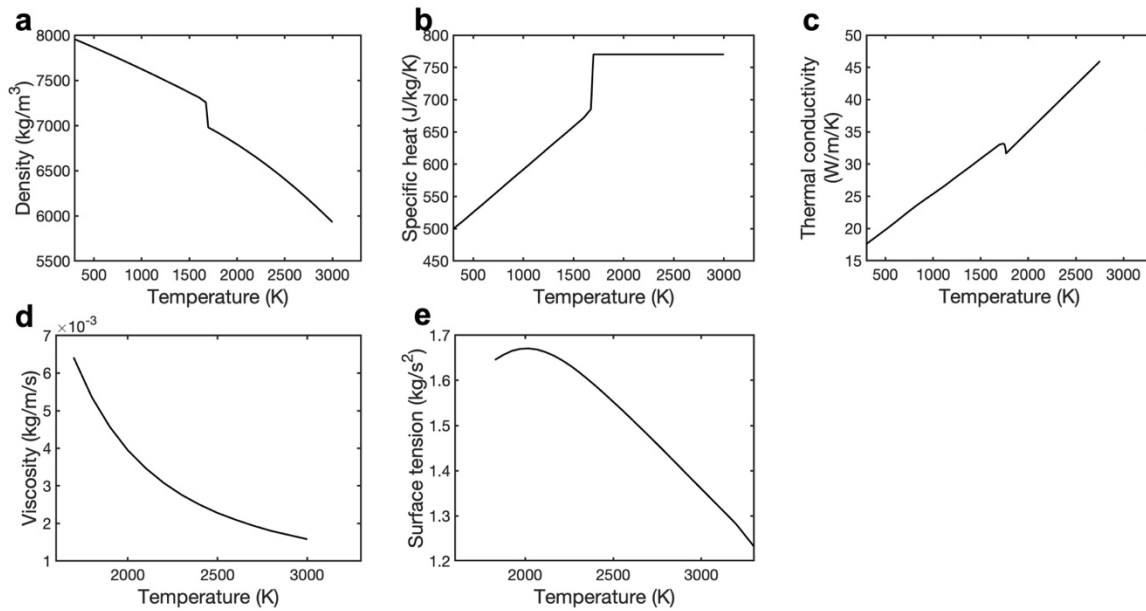

**Supplementary Fig. 4 Thermophysical properties of stainless steel**

**a** Density, **b** specific heat, **c** thermal conductivity, **d** viscosity, and **e** surface tension. They were obtained from references <sup>3-5</sup>.

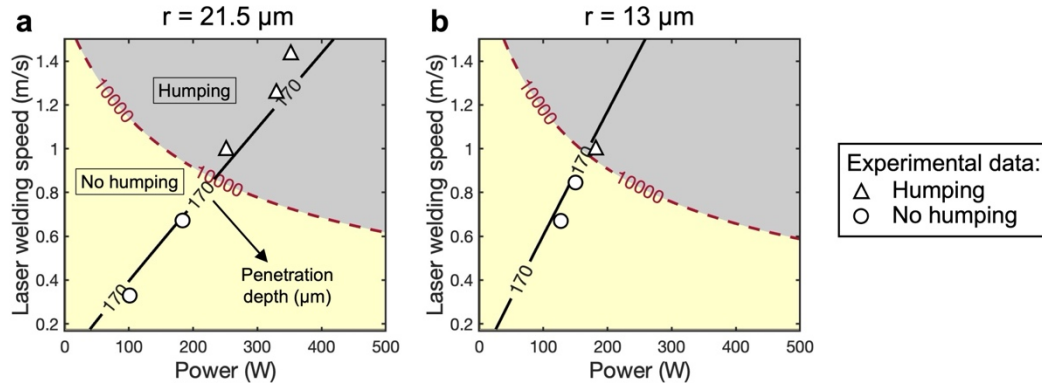

**Supplementary Fig. 5 Experimental validation of onset threshold of humping predicted by dimensionless humping index ( $\pi_h$ )**

Experimental results along with the onset threshold of humping ( $\pi_h$  of 10,000) and the isoline of penetration depth of 170  $\mu\text{m}$  for spot radii ( $r$ ) of **a** 21.5  $\mu\text{m}$  and **b** 13  $\mu\text{m}$ .

**Supplementary Table 1: Laser process parameters**

All laser process parameters with the corresponding heat inputs calculated by the equation (Heat input =  $P \times \eta / u_w$  <sup>6</sup>).  $\eta$  (overall welding efficiency) is taken as 0.80 from the ref. <sup>7</sup>.

| Laser welding speed ( $u_w$ ) (m/s) | Power ( $P$ ) (W) | Heat input (J/m) |
|-------------------------------------|-------------------|------------------|
| 0.33                                | 102               | 247.27           |
| 0.67                                | 188               | 224.48           |
| 1.00*                               | 249               | 199.20           |
| 1.25*                               | 323               | 206.72           |
| 1.42*                               | 348               | 196.06           |

\*Humping occurred

**Supplementary Table 2 Materials constants used in Equation 1–3 and 5 (obtained from ref. 3–5)**

| Material's constants                     | Values at $T_m$                | Values at $T_b$            |
|------------------------------------------|--------------------------------|----------------------------|
| Density ( $\rho$ )                       | $7000 \frac{kg}{m^3}$          | $6000 \frac{kg}{m^3}$      |
| Thermal conductivity ( $k$ )             | $30 \frac{W}{m \cdot K}$       | $45 \frac{W}{m \cdot K}$   |
| Specific heat ( $c_p$ )                  | $770 \frac{J}{kg \cdot K}$     | $770 \frac{J}{kg \cdot K}$ |
| Surface tension coefficient ( $\gamma$ ) | $1.65 \frac{kg}{s^2}$          | $1.30 \frac{kg}{s^2}$      |
| Boiling temperature ( $T_b$ )            | 3134 K                         |                            |
| Melting temperature ( $T_m$ )            | 1698 K                         |                            |
| Ambient temperature ( $T_0$ )            | 300 K                          |                            |
| Latent heat of fusion ( $L_m$ )          | $2.6 \times 10^5 \frac{J}{kg}$ |                            |

**Supplementary Table 3 Validation of CFD simulation models, including molten pool (MP) dimensions (length, width, depth) and humping characteristics (linear number density and average height of humps)**

| Condition          | Feature                               | Experiment                     | CFD simulation    | Error (%) |
|--------------------|---------------------------------------|--------------------------------|-------------------|-----------|
| 0.33 m/s,<br>102 W | MP length ( $\mu m$ )                 | 368 <sup>*</sup>               | 400               | 8.7       |
|                    | MP width ( $\mu m$ )                  | 116 <sup>^</sup>               | 120               | 3.4       |
|                    | MP depth ( $\mu m$ )                  | 170 <sup>*</sup>               | 170               | 0         |
| 1.42 m/s,<br>348 W | MP length ( $\mu m$ )                 | 1080 <sup>*</sup>              | 1180              | 9.3       |
|                    | MP width ( $\mu m$ )                  | 93 <sup>^</sup>                | 100               | 7.5       |
|                    | MP depth ( $\mu m$ )                  | 170 <sup>*</sup>               | 170               | 0         |
|                    | Linear number density of humps (#/mm) | 1.50 <sup>^</sup>              | 1.46              | 2.7       |
|                    | Average height of humps ( $\mu m$ )   | $58.70 \pm 14.82$ <sup>^</sup> | $53.00 \pm 15.36$ | 9.7       |

<sup>\*</sup> From in situ synchrotron X-ray imaging of laser welding process

<sup>^</sup> From optical profilometry of the top surfaces of laser welds

**Supplementary Table 4 The maximum melt velocity ( $u_{max}$ ) from analytical calculations using Equation 1 (Beck et al. <sup>8</sup>) and CFD simulations**

| Condition       | Feature                                  | Analytical calculation | CFD simulation | Error (%) |
|-----------------|------------------------------------------|------------------------|----------------|-----------|
| 0.33 m/s, 102 W | Maximum melt velocity ( $u_{max}$ , m/s) | 0.86                   | 0.92           | 7.0       |
| 1.42 m/s, 348 W |                                          | 6.05                   | 5.69           | 6.0       |

### Supplementary References

1. Das, A., Fritz, R., Finuf, M. & Masters, I. Blue laser welding of multi-layered AISI 316L stainless steel micro-foils. *Opt Laser Technol* 132, 106498 (2020).
2. Standard Test Method for Peel Resistance of Adhesives (T-Peel Test). *ASTM D1876*.
3. Chen, N. *et al.* Microstructural characteristics and crack formation in additively manufactured bimetal material of 316L stainless steel and Inconel 625. *Addit Manuf* 32, 101037 (2020).
4. Kim, C. S. Thermophysical properties of stainless steels. *Argonne National Lab., Ill. (USA)* (1975).
5. Meng, X., Qin, G. & Zou, Z. Investigation of humping defect in high speed gas tungsten arc welding by numerical modelling. *Mater Des* 94, 69–78 (2016).
6. Benyounis, K. Y., Olabi, A. G. & Hashmi, M. S. J. Effect of laser welding parameters on the heat input and weld-bead profile. *J Mater Process Technol* 164–165, 978–985 (2005).
7. Fuerschbach, P. W. Measurement and prediction of energy transfer efficiency in laser beam welding. 75, (1996).

8. Beck, M., Berger, P., Dausinger, F. & Huegel, H. Aspects of keyhole/melt interaction in high-speed laser welding. in *Proc.SPIE* vol. 1397 769–774 (1991).
