# Supplementary material for: Unveiling mechanisms and onset threshold of humping in high-speed laser welding
Source: PubMed Central journal article supplement — Nat Commun. 2024 Nov 5;15:9546. doi: 10.1038/s41467-024-53888-w (PMC11538395; doi:10.1038/s41467-024-53888-w), 2024-11-05
Supplement: 41467_2024_53888_MOESM2_ESM.pdf [file 41467_2024_53888_MOESM2_ESM.pdf]

## **Supplementary Movie Legends**

**Supplementary Movie 1** In situ synchrotron X-ray imaging of laser welding conducted at the welding speed of 0.33 m/s with the power of 102 W.

**Supplementary Movie 2** In situ synchrotron X-ray imaging of laser welding conducted at the welding speed of 0.67 m/s with the power of 188 W.

**Supplementary Movie 3** In situ synchrotron X-ray imaging of laser welding conducted at the welding speed of 1.00 m/s with the power of 249 W.

**Supplementary Movie 4** In situ synchrotron X-ray imaging of laser welding conducted at the welding speed of 1.25 m/s with the power of 323 W.

**Supplementary Movie 5** In situ synchrotron X-ray imaging of laser welding conducted at the welding speed of 1.42 m/s with the power of 348 W.
